# Supplementary material for: IL-33 drives the production of mouse regulatory T cells with enhanced in vivo suppressive activity in skin transplantation
Source: PubMed Central journal article supplement (PMC7613121; doi:10.1111/ajt.16266), 2020-09-15
Supplement: EMS150705-supplement-Supplementary_Material.pdf [file EMS150705-supplement-Supplementary_Material.pdf]

|                    | probe.ID            | Log2 fold change | BY.p.value |
|--------------------|---------------------|------------------|------------|
| <b>Il7r-mRNA</b>   | NM_008372.3:1020    | -1.04            | 0.000909   |
| <b>S100a8-mRNA</b> | NM_013650.2:227     | 2.11             | 0.019      |
| <b>Lck-mRNA</b>    | NM_010693.2:1180    | -1.26            | 0.019      |
| <b>Il18r1-mRNA</b> | NM_001161842.1:620  | -1.06            | 0.024      |
| <b>Jak1-mRNA</b>   | NM_146145.2:4080    | -0.73            | 0.024      |
| <b>Ccl9-mRNA</b>   | NM_011338.2:1125    | 1.63             | 0.0287     |
| <b>Bcl10-mRNA</b>  | NM_009740.1:1168    | -0.504           | 0.0325     |
| <b>Mpo-mRNA</b>    | NM_010824.2:1648    | 4.69             | 0.037      |
| <b>Lcn2-mRNA</b>   | NM_008491.1:190     | 2.44             | 0.0391     |
| <b>Apoe-mRNA</b>   | NM_009696.3:129     | -0.795           | 0.0431     |
| <b>Egr3-mRNA</b>   | NM_018781.2:518     | -1.21            | 0.0431     |
| <b>Mrc1-mRNA</b>   | NM_008625.1:3992    | 1.06             | 0.0431     |
| <b>Vim-mRNA</b>    | NM_011701.4:34      | 0.873            | 0.0431     |
| <b>C3-mRNA</b>     | NM_009778.2:285     | 3.35             | 0.0431     |
| <b>Ikbke-mRNA</b>  | NM_019777.3:618     | -1.07            | 0.0431     |
| <b>Thy1-mRNA</b>   | NM_009382.3:425     | -1.05            | 0.0431     |
| <b>Cd7-mRNA</b>    | NM_009854.1:234     | -1.31            | 0.0431     |
| <b>Ncr1-mRNA</b>   | NM_010746.3:391     | -1.29            | 0.0431     |
| <b>Il2rb-mRNA</b>  | NM_008368.3:2365    | -0.807           | 0.0431     |
| <b>Cd247-mRNA</b>  | NM_001113391.2:215  | -1.39            | 0.0431     |
| <b>Chil3-mRNA</b>  | NM_009892.2:823     | 5.51             | 0.0431     |
| <b>Cd6-mRNA</b>    | NM_001037801.2:1315 | -1.18            | 0.0431     |
| <b>Itk-mRNA</b>    | NM_010583.3:404     | -1.58            | 0.0431     |
| <b>Zap70-mRNA</b>  | NM_009539.2:1030    | -0.894           | 0.0431     |
| <b>Lgals3-mRNA</b> | NM_001145953.1:665  | 1.16             | 0.0431     |
| <b>Pparg-mRNA</b>  | NM_011146.1:1060    | 3.33             | 0.0431     |
| <b>Xbp1-mRNA</b>   | NM_013842.2:825     | 1.21             | 0.0431     |
| <b>Ccr7-mRNA</b>   | NM_007719.2:755     | -1.44            | 0.0431     |
| <b>Cd3e-mRNA</b>   | NM_007648.4:380     | -1.23            | 0.0481     |
| <b>Cd55-mRNA</b>   | NM_010016.2:1058    | -0.787           | 0.0481     |
| <b>C1qbp-mRNA</b>  | NM_007573.2:630     | 0.548            | 0.0481     |
| <b>Nfatc3-mRNA</b> | NM_010901.2:2260    | -0.502           | 0.0481     |
| <b>Camp-mRNA</b>   | NM_009921.2:355     | 1.96             | 0.0481     |
| <b>Ccl24-mRNA</b>  | NM_019577.4:335     | 8.89             | 0.0481     |
| <b>Cd81-mRNA</b>   | NM_133655.2:575     | 0.243            | 0.0481     |

**Supplementary Table 1. Significantly differentiated genes between splenocytes of PBS and IL-33-treated mice.** Statistically significant (adjusted  $p$  value  $<0.05$ ) differentially regulated genes between splenocytes of PBS ( $n=3$ ) and IL-33-treated ( $n=3$ ) mice ( $1\mu\text{g/day}$  for 6 consecutive days and sacrificed on day 7) are shown with respective Log2 fold change and probe ID. Adjusted  $p$  value calculated with control of False Discovery Rate (FDR) using Benjamini-Yekutieli method.

| Condition              | n  | Survival (days)                        | MST  |
|------------------------|----|----------------------------------------|------|
| WT Teff only           | 8  | 10,10,12,14,14,14,15,26                | 14   |
| WT Teff + Control Treg | 11 | 16,21,34,37,40,40,49,64,76,100,100     | 40   |
| WT Teff + IL-33-Treg   | 11 | 43,51,53,55,64,100,100,100,100,100,100 | >100 |

**Supplementary Table 2. IL-33 Tregs promote long-term skin allograft survival.** Graft survival (days) of mice receiving WT Teffs only (n=8), WT Teffs + control Tregs (n=11), and WT Teffs + IL-33-Tregs (n=11).

|                     | probe.ID            | Log2 fold change | BY.p.value |
|---------------------|---------------------|------------------|------------|
| <b>Tcf7-mRNA</b>    | NM_009331.3:1810    | -1.3             | 0.00472    |
| <b>Il1rl1-mRNA</b>  | NM_001025602.2:815  | 2.38             | 0.00472    |
| <b>Ifitm2-mRNA</b>  | NM_030694.1:87      | 2.7              | 0.00472    |
| <b>Gzmb-mRNA</b>    | NM_013542.2:1020    | 5.47             | 0.00581    |
| <b>Ccr2-mRNA</b>    | NM_009915.2:2965    | 1.8              | 0.00581    |
| <b>Stat1-mRNA</b>   | NM_009283.3:1590    | -1.15            | 0.0073     |
| <b>Ccr7-mRNA</b>    | NM_007719.2:755     | -1.71            | 0.00758    |
| <b>Card11-mRNA</b>  | NM_175362.2:545     | -0.739           | 0.00893    |
| <b>Gzma-mRNA</b>    | NM_010370.2:188     | 4.33             | 0.00893    |
| <b>Icos-mRNA</b>    | NM_017480.1:142     | 1.56             | 0.00893    |
| <b>Ccr9-mRNA</b>    | NM_009913.6:820     | 1.32             | 0.00933    |
| <b>Stat6-mRNA</b>   | NM_009284.2:3465    | -0.515           | 0.0103     |
| <b>Batf-mRNA</b>    | NM_016767.2:750     | 1.52             | 0.0114     |
| <b>Lgals3-mRNA</b>  | NM_001145953.1:665  | 1.68             | 0.0114     |
| <b>Ccr4-mRNA</b>    | NM_009916.2:394     | 1.78             | 0.0123     |
| <b>Klrg1-mRNA</b>   | NM_016970.1:825     | 1.94             | 0.0123     |
| <b>Ltb-mRNA</b>     | NM_008518.2:163     | -1.22            | 0.0154     |
| <b>Jun-mRNA</b>     | NM_010591.2:2212    | -1.49            | 0.0154     |
| <b>Cd96-mRNA</b>    | NM_032465.2:34      | -1.13            | 0.0154     |
| <b>Tigit-mRNA</b>   | NM_001146325.1:730  | 1.67             | 0.0206     |
| <b>Smad4-mRNA</b>   | NM_008540.2:2885    | -0.716           | 0.0206     |
| <b>Lag3-mRNA</b>    | NM_008479.1:1700    | 2.77             | 0.0222     |
| <b>Itgb1-mRNA</b>   | NM_010578.1:1855    | 0.953            | 0.0223     |
| <b>H2-K1-mRNA</b>   | NM_001001892.2:1370 | -0.604           | 0.0223     |
| <b>Itga6-mRNA</b>   | NM_008397.3:910     | -0.591           | 0.0223     |
| <b>Sell-mRNA</b>    | NM_001164059.1:664  | -1.14            | 0.0233     |
| <b>Vim-mRNA</b>     | NM_011701.4:34      | 1.09             | 0.0397     |
| <b>Lta-mRNA</b>     | NM_010735.1:1115    | -1.5             | 0.0397     |
| <b>Gata3-mRNA</b>   | NM_008091.3:1943    | 1.11             | 0.04       |
| <b>Il6ra-mRNA</b>   | NM_010559.2:2825    | -1.32            | 0.0441     |
| <b>Hif1a-mRNA</b>   | NM_010431.2:1294    | 0.921            | 0.0441     |
| <b>Cd27-mRNA</b>    | NM_001033126.2:235  | -0.873           | 0.0441     |
| <b>Gpr183-mRNA</b>  | NM_183031.2:238     | 1.09             | 0.0441     |
| <b>Fos-mRNA</b>     | NM_010234.2:1330    | -0.415           | 0.0441     |
| <b>Jak1-mRNA</b>    | NM_146145.2:4080    | -0.613           | 0.0441     |
| <b>Psma2-mRNA</b>   | NM_008944.2:136     | 0.376            | 0.0441     |
| <b>Cd200r1-mRNA</b> | NM_021325.3:1090    | 1.21             | 0.0494     |

**Supplementary Table 3. Significantly differentiated genes between control and IL-33-Tregs.** Statistically significant (adjusted *p* value <0.05) differentially regulated genes between CD4<sup>+</sup>CD25<sup>+</sup> Tregs of PBS (n=3) and IL-33-treated (n=4) mice, as described previously, are shown with respective Log2 fold change and probe ID. Adjusted *p* value calculated with control of False Discovery Rate (FDR) using Benjamini-Yekutieli method.

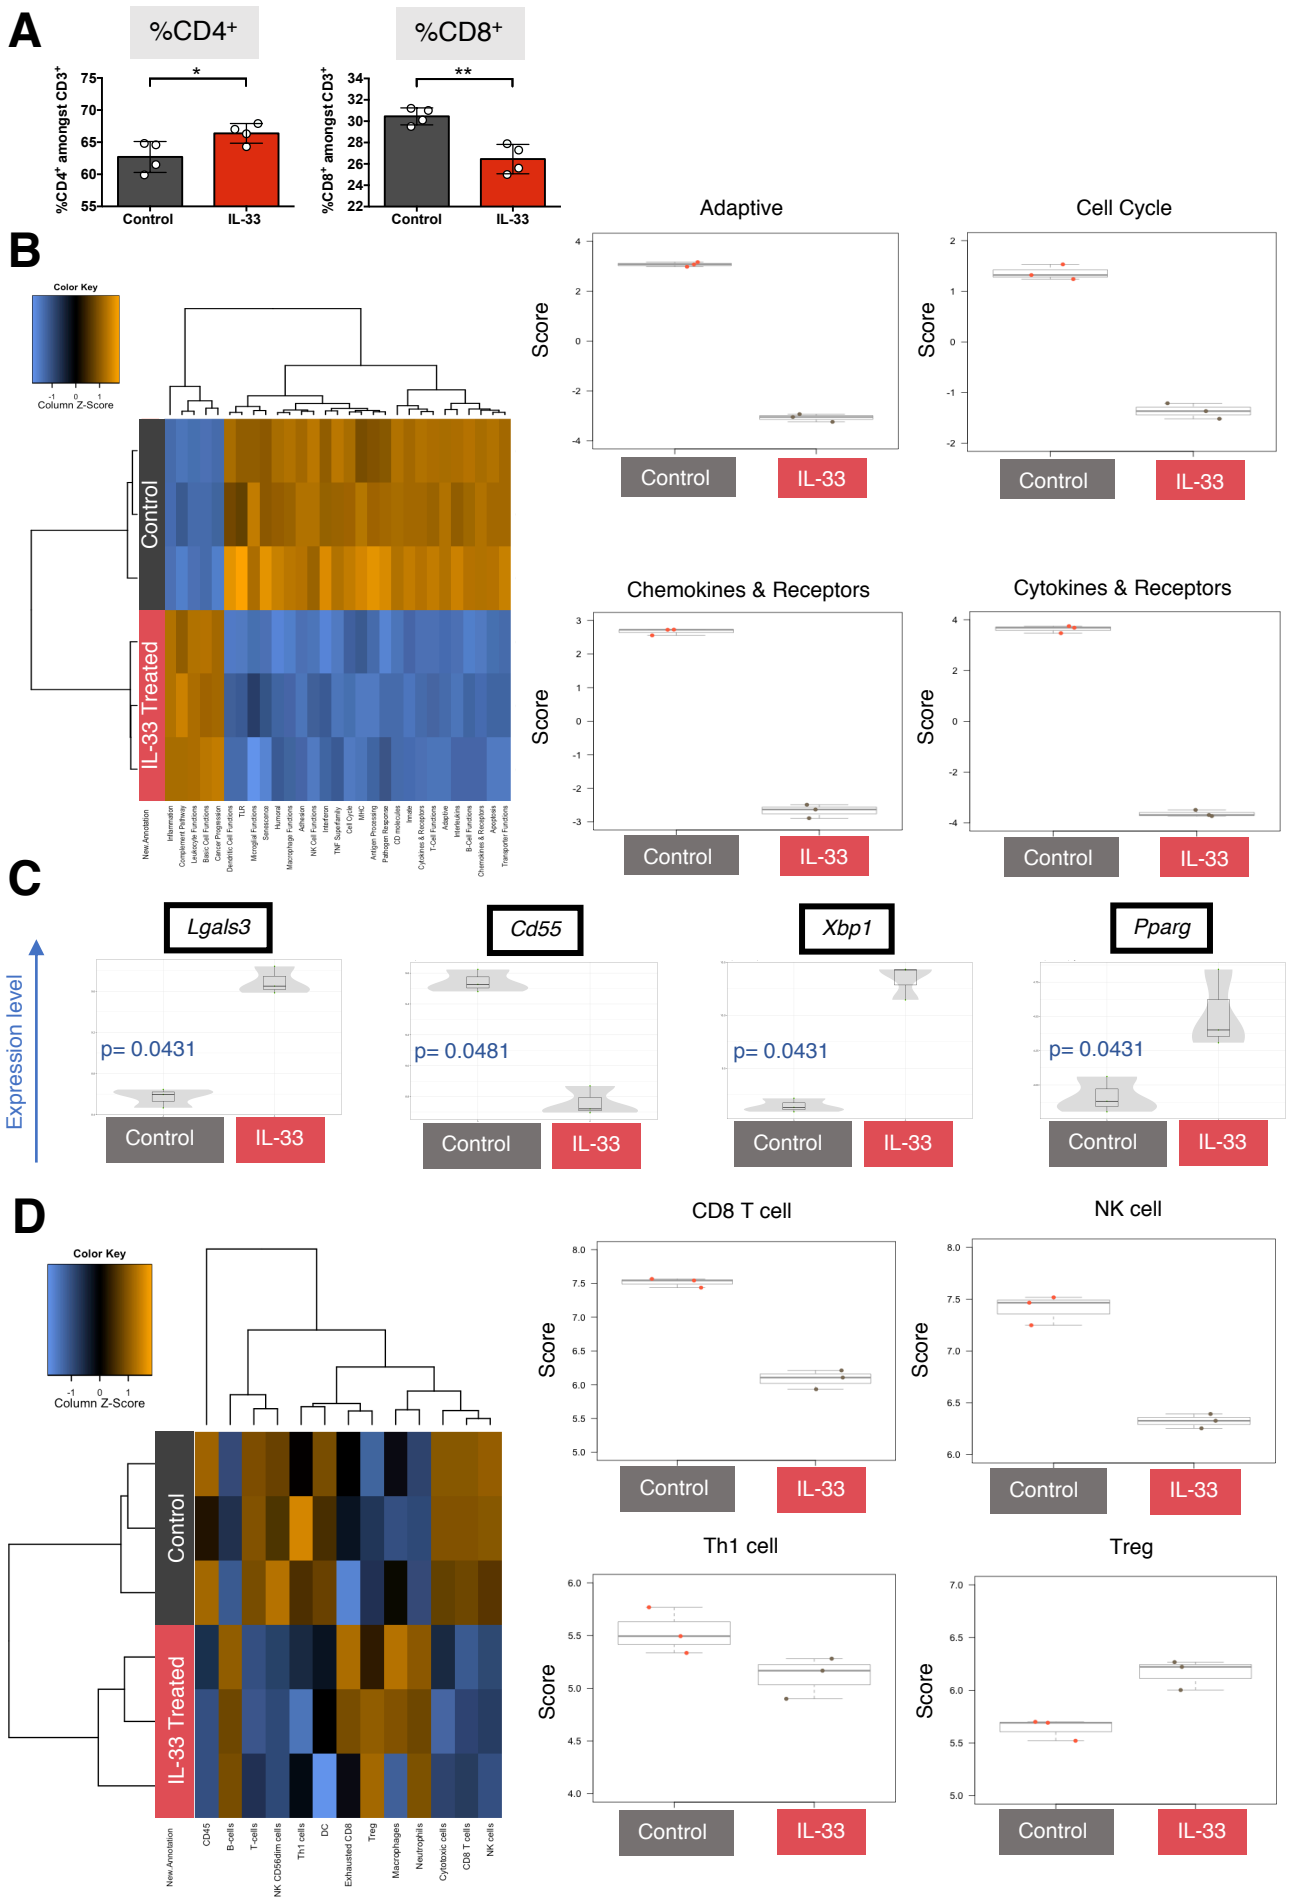

**Supplementary Figure 1.** CBA/Ca (H-2<sup>k</sup>) mice were injected with either PBS (control, black) or recombinant IL-33 (1ug/day, red) for 6 consecutive days, and spleens were harvested 24 hours after last injection and analyzed for flow cytometric and transcriptomic analysis. **(A)** Graphs of CD4 and CD8 expression. **(B)** Heat map and dot plots of gene expression profiles of pathway scores, which are fit using the first principal component of each sample based on the individual gene expression levels for all the measured genes within a specific pathway. **(C)** Select genes associated with T cell development and function are represented in scatter violin plots. **(D)** Heat map and dotplots of gene expression profiles of cell type scores, which are displayed on the same scale via a Z-transformation.

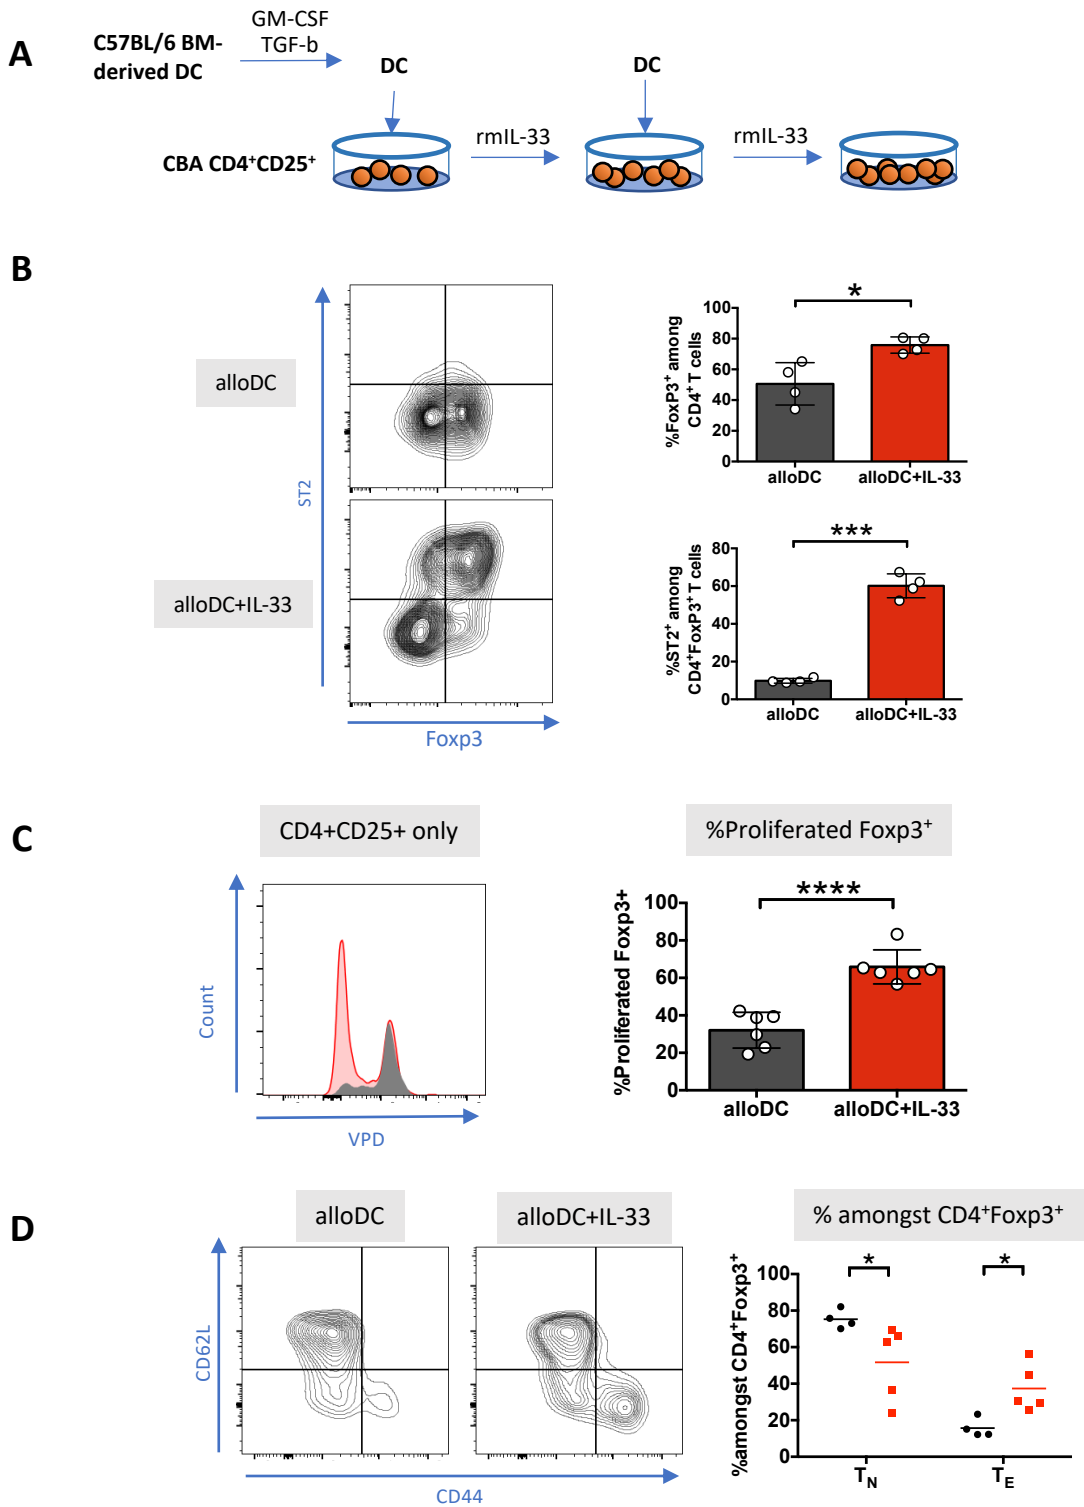

**Supplementary Figure 2. (A)** CD4<sup>+</sup>CD25<sup>+</sup> Tregs were isolated from CBA/Ca (H-2<sup>k</sup>) spleens, stained with violet proliferation dye (VPD), and stimulated with/without IL-33 (10ng/mL) and C57BL/6 (H-2<sup>b</sup>) allogeneic DCs (GT-DC), which were generated in the presence of GM-CSF (10ng/mL) and TGF- $\beta$  (2ng/mL). Cultures were restimulated with new GT-DC and IL-33 after one week and were harvested for flow cytometric analysis after two weeks. **(B)** Representative dot plots and graphs of expression of Foxp3 and ST2 of CD4<sup>+</sup>CD25<sup>+</sup> cultures after stimulation with IL-33 and GT-DC. (unpaired *t* test, n=4) (\**p*<0.05; \*\*\**p*<0.001; \*\*\*\**p*<0.0001; ns=not significant.) **(C)** Histogram and graph of Foxp3<sup>+</sup> cells proliferation within CD4<sup>+</sup>CD25<sup>+</sup> cultures. **(D)** Representative dot plots and graph of CD44 and CD62L expression within CD4<sup>+</sup>CD25<sup>+</sup> cultures. (unpaired *t* test, n=4) (\**p*<0.05; \*\*\*\**p*<0.0001; ns=not significant).

**A**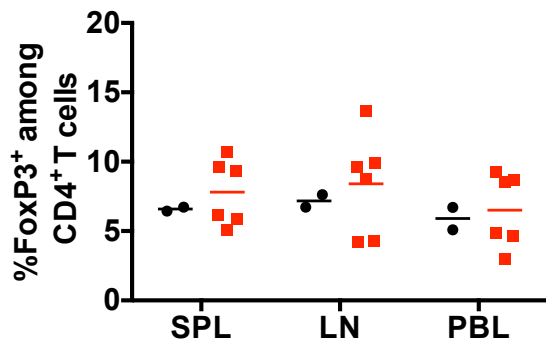**B**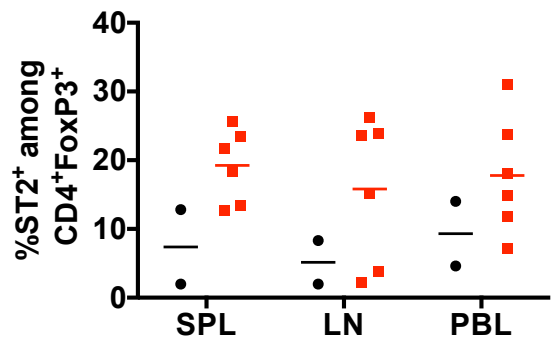

**Supplementary Figure 3.** CBA/Ca Rag1<sup>-/-</sup> (H-2<sup>k</sup>) received control CD4<sup>+</sup>GFP<sup>neg</sup> effector T cells (Teff) with or without CD4<sup>+</sup>GFP<sup>+</sup> Tregs from H-2<sup>k</sup> Foxp3-GFP mice that were treated with PBS or IL-33 (1 $\mu$ g/day for 6 consecutive days and sacrificed on day 7). One day later, mice received an allogeneic fully-MHC mismatched H-2<sup>b</sup> skin allograft, which was monitored for rejection for 100 days post-transplantation. Mice that received Teffs and control (black, n=2) or IL-33-Tregs (red, n=6) and reached long-term graft survival (>100 days) were sacrificed at d100 and spleens (SPL), graft-draining lymph nodes (LN), and peripheral blood (PB) were harvested and analyzed by flow cytometry for Foxp3 (**A**) and ST2 (**B**) expression.

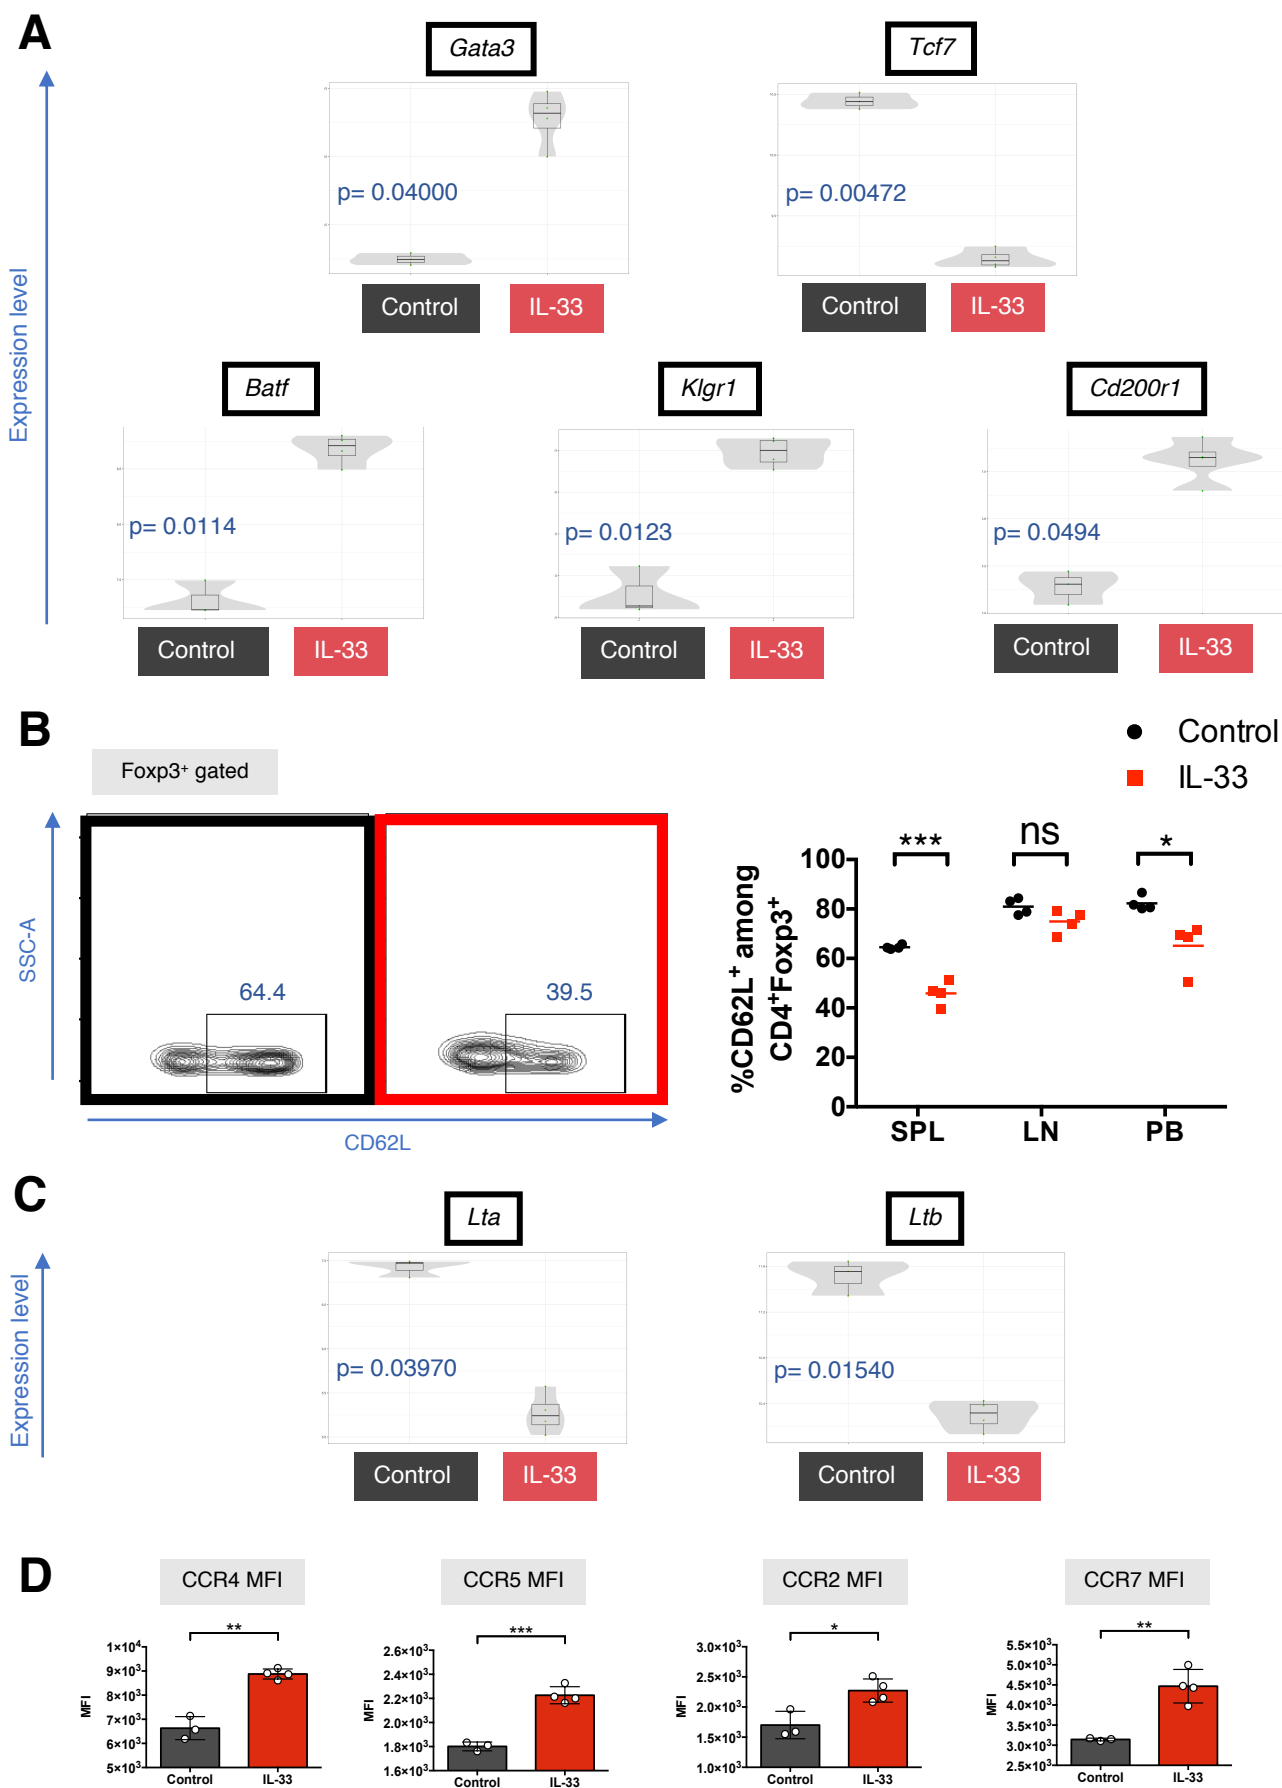

**Supplementary Figure 4. (A and C)** RNA from CBA/Ca (H-2<sup>k</sup>) splenocyte-derived CD4<sup>+</sup>CD25<sup>+</sup> Tregs were FACS-sorted from PBS (n=3) or IL-33 treated H-2<sup>k</sup> mice (n=4, 1 $\mu$ g/day for 6 consecutive days and sacrificed on day 7) for gene expression analysis. **(A)** Genes *Tcf7*, *Gata3*, *Batf*, *Klrg1*, and *Cd200r1* are represented in univariate violin plots. **(B)** CBA/Ca (H-2<sup>k</sup>) mice were injected with either PBS (control, black) or recombinant IL-33 (red, 1 $\mu$ g/day for 6 consecutive days and sacrificed on day 7). Representative dotplots (from splenocytes) and graphs of expression of CD62L within CD4<sup>+</sup>Foxp3<sup>+</sup> gated populations in the spleen (SPL), lymph node (LN), and peripheral blood (PB) (unpaired *t* test, n=4) (\**p*<0.05; \*\*\**p*<0.001; ns=not significant). **(C)** Genes *Lta* and *Ltb* are represented in univariate violin plots. **(D)** Representative dotplots and graphs of showing MFI of select chemokine receptor molecules (unpaired *t* test, n=4) (\**p*<0.05; \*\**p*<0.01; \*\*\**p*<0.001; \*\*\*\**p*<0.0001; ns=not significant).

**A**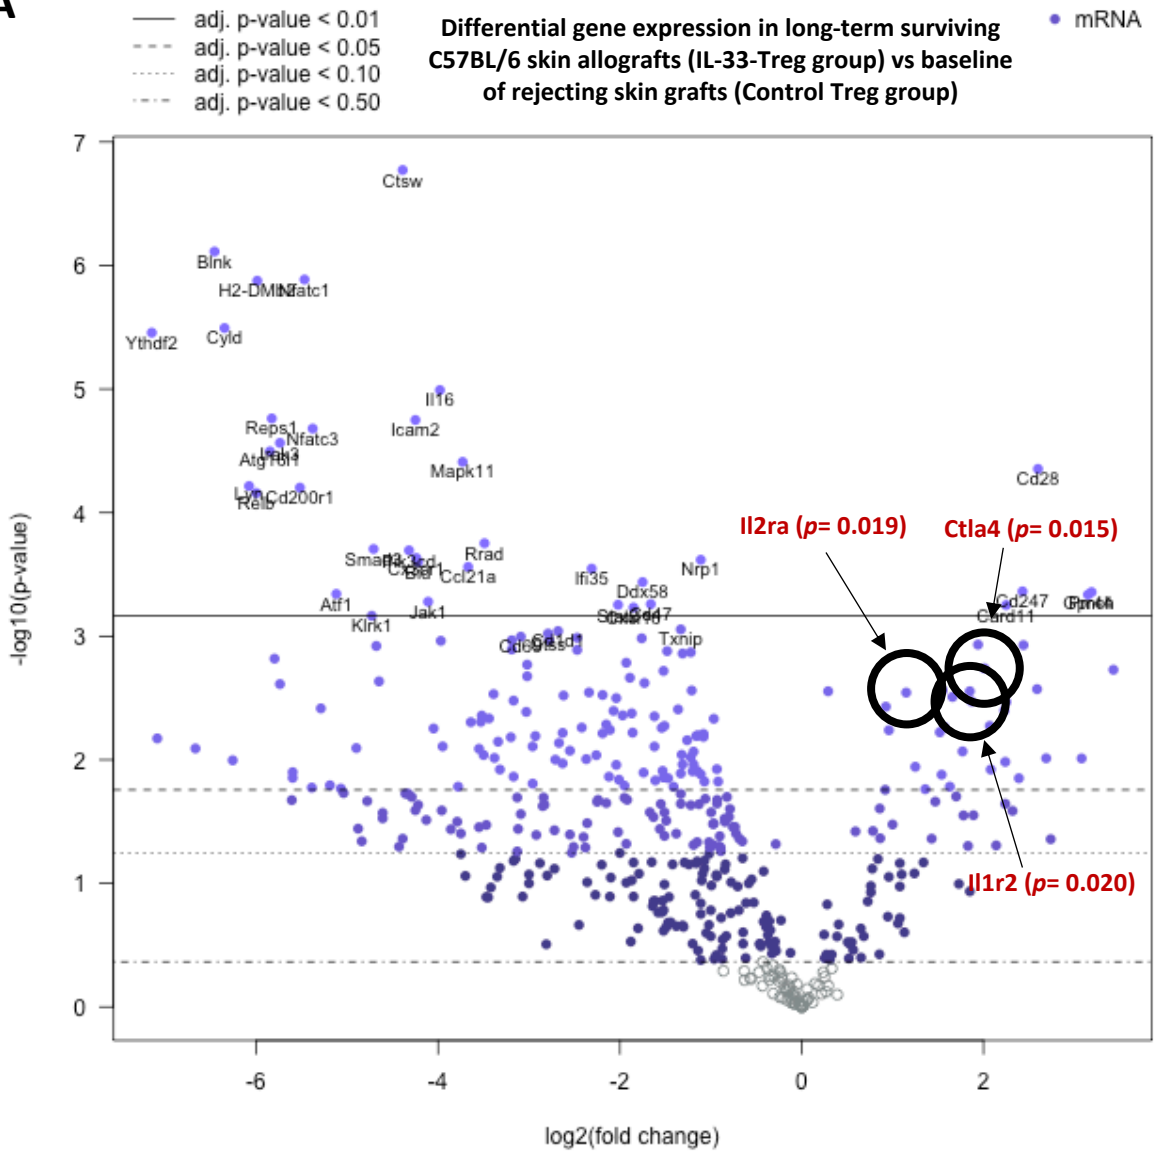

**Supplementary Figure 5.** CBA/Ca Rag1<sup>-/-</sup> (H-2<sup>k</sup>) received control CD4<sup>+</sup>GFP<sup>neg</sup> effector T cells (Teff) with or without CD4<sup>+</sup>GFP<sup>+</sup> Tregs from H-2<sup>k</sup> Foxp3-GFP mice that were treated with PBS or IL-33 (1 $\mu$ g/day for 6 consecutive days and sacrificed on day 7). One day later, mice received an allogeneic fully-MHC mismatched H-2<sup>b</sup> skin allograft, which was monitored for rejection for 100 days post-transplantation. Rejecting skin grafts from the control Treg group (n=2) and grafts that reached long-term survival (>100 days) from the IL-33-Tregs group (n=2) were analyzed with Nanostring Transcriptomic analysis. Adjusted  $p$  value calculated with control of Benjamini-Hochberg False Discovery Rate (FDR) (Adjusted  $p$  value > 0.05 considered significant, FDR thresholds indicated within volcano plot.)
